# Supplementary material for: Efficient Intracellular Delivery of Cell-Impermeable Cargo Molecules by Peptides Containing Tryptophan and Histidine
Source: PubMed Central journal article supplement (PMC6100250; doi:10.3390/molecules23071536), 2018-06-26
Supplement: molecules-23-01536-s001.pdf [file molecules-23-01536-s001.pdf]

# Supplementary Information

## Efficient Intracellular Delivery of Cell-impermeable Cargo Molecules by Peptides Containing Tryptophan and Histidine

Amir Nasrolahi Shirazi, Saghar Mozaffari, Rinzhin Tshering Sherpa, Rakesh Tiwari\*, and  
Keykavous Parang\*

Center for Targeted Drug Delivery, Department of Biomedical and Pharmaceutical Sciences, Chapman University  
School of Pharmacy, Harry and Diane Rinker Health Science Campus, Irvine, California 92618, United States

[nasro100@mail.chapman.edu](mailto:nasro100@mail.chapman.edu) (A.N.S.); [mozaf100@mail.chapman.edu](mailto:mozaf100@mail.chapman.edu) (S.M.); [sherp101@mail.chapman.edu](mailto:sherp101@mail.chapman.edu) (R.S.)  
[tiwari@chapman.edu](mailto:tiwari@chapman.edu) (R.T.); [parang@chapman.edu](mailto:parang@chapman.edu) (K.P.)

\* Correspondence: [parang@chapman.edu](mailto:parang@chapman.edu); Tel.: +1-714-516-5489

## Table of Contents:

|                                                                                                        | <b>Page</b> |
|--------------------------------------------------------------------------------------------------------|-------------|
| 1. MALDI mass spectrum of linear and cyclic (WH) <sub>5</sub> peptides                                 | <b>3</b>    |
| 2. Analytical HPLC chromatogram of linear and cyclic peptides, (WH) <sub>5</sub> and [WH] <sub>5</sub> | <b>5</b>    |

## 1. MALDI mass spectrum of linear and cyclic peptides

**Figure S1.** MALDI mass spectra of linear (WH)<sub>5</sub> peptide.

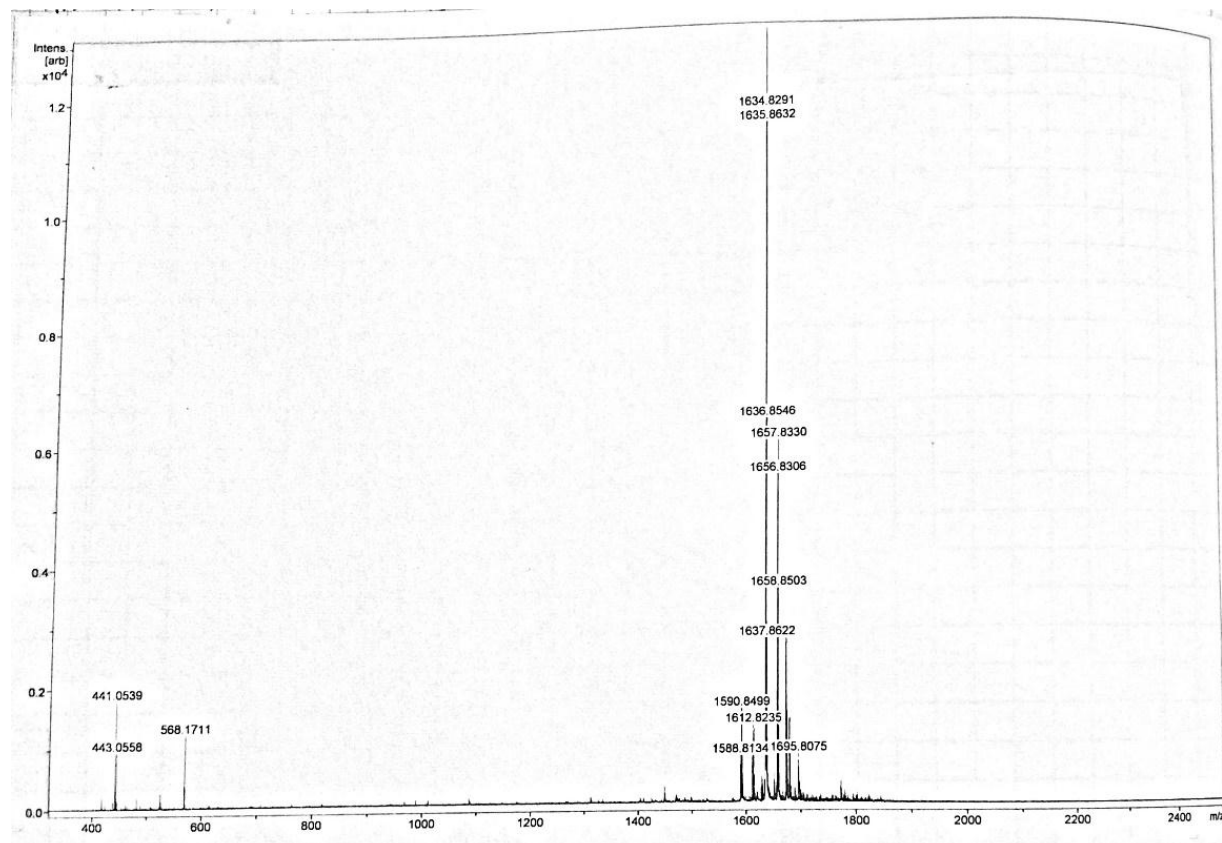

**Figure S2.** MALDI mass spectra of cyclic [WH]<sub>5</sub> peptide.

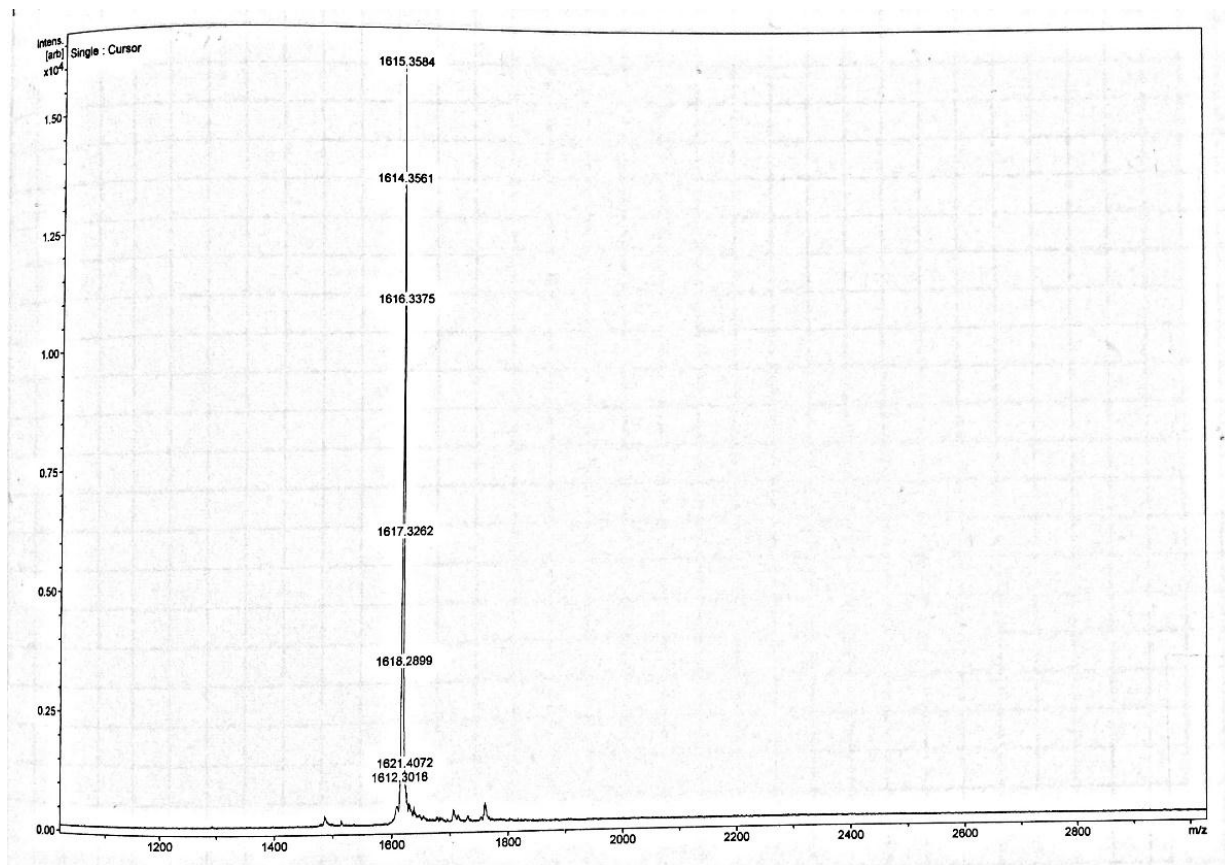

## 2. Analytical HPLC chromatogram of linear and cyclic peptides

Figure S3. Analytical HPLC chromatogram of linear (WH)<sub>5</sub> peptide.

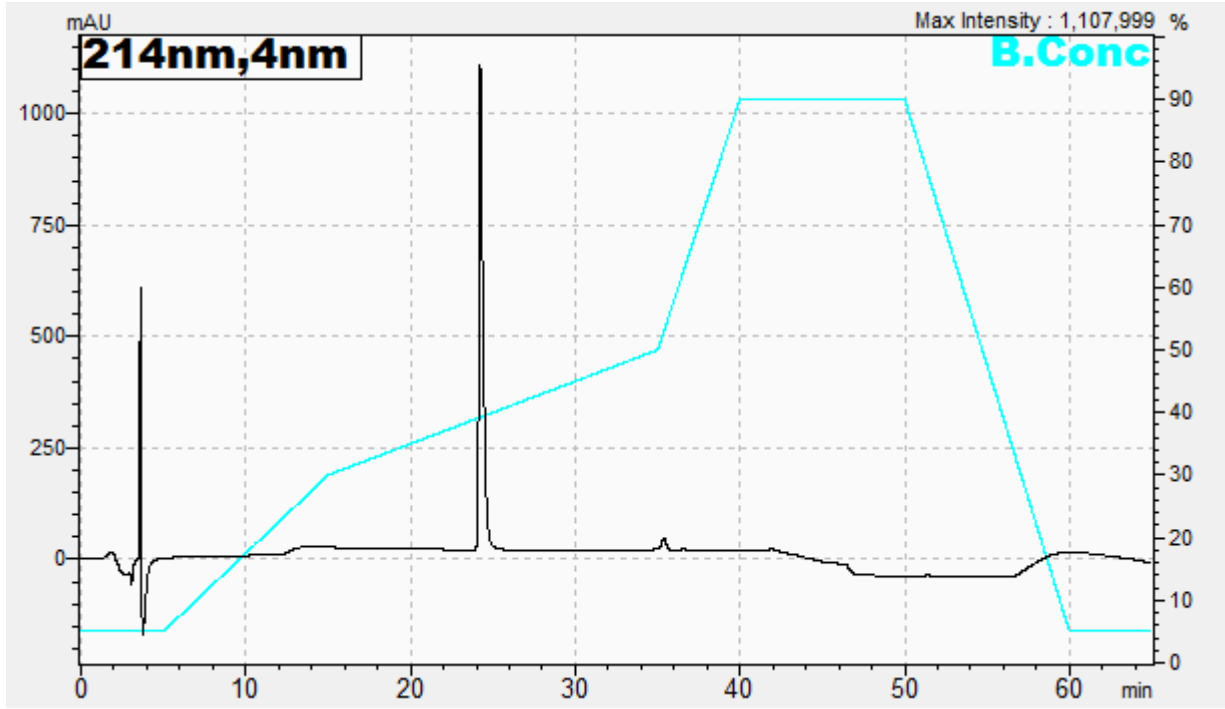

### HPLC Method:

|   | Time  | Module     | Command         | Value |
|---|-------|------------|-----------------|-------|
| 1 | 5.00  | Pumps      | Solvent B Conc. | 5     |
| 2 | 15.00 | Pumps      | Solvent B Conc. | 30    |
| 3 | 35.00 | Pumps      | Solvent B Conc. | 50    |
| 4 | 40.00 | Pumps      | Solvent B Conc. | 90    |
| 5 | 50.00 | Pumps      | Solvent B Conc. | 90    |
| 6 | 60.00 | Pumps      | Solvent B Conc. | 5     |
| 7 | 65.00 | Controller | Stop            |       |

**Figure S4.** Analytical HPLC chromatogram of cyclic [WH]<sub>5</sub> peptide.

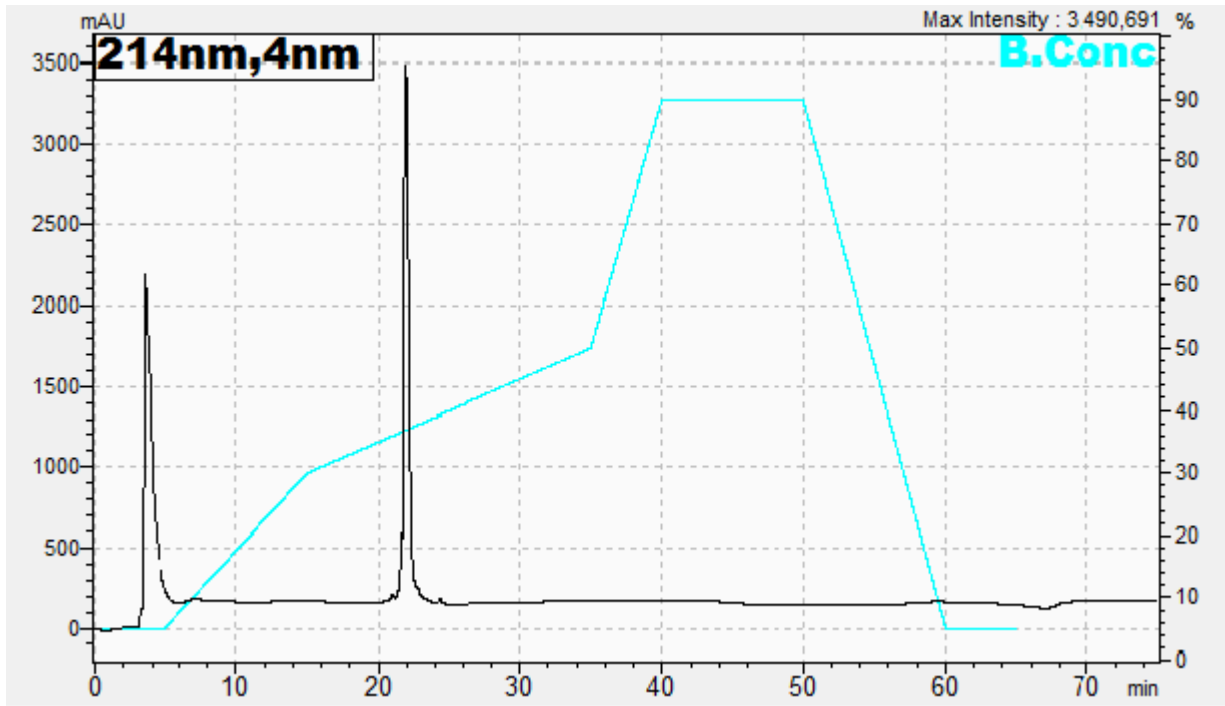

**HPLC Method:**

|   | Time  | Module     | Command         | Value |
|---|-------|------------|-----------------|-------|
| 1 | 5.00  | Pumps      | Solvent B Conc. | 5     |
| 2 | 15.00 | Pumps      | Solvent B Conc. | 30    |
| 3 | 35.00 | Pumps      | Solvent B Conc. | 50    |
| 4 | 40.00 | Pumps      | Solvent B Conc. | 90    |
| 5 | 50.00 | Pumps      | Solvent B Conc. | 90    |
| 6 | 60.00 | Pumps      | Solvent B Conc. | 5     |
| 7 | 65.00 | Controller | Stop            |       |
